# Supplementary material
Source: publisher site journal article supplement (https://www.dovepress.com/article/316276)

**Appendix 1: Utilities elicitation process** **using “ping-pong” method**

**Initial question 1:**

Which would you rather?

Life A: Living with hemophilia for 10 years followed by death

Life B: living in perfect health for 10 years followed by death

Participant chooses Life A (hemophilia): They likely do not understand exercise (or prefer hemophilia to perfect health – in which case, please terminate the interview)

Participant chooses Life B (perfect health): Proceed to question 2

Participant chooses ‘They are about the same’: You are done (utility = 1.00)

**Initial question 2:**

Which would you rather?

Life A: Living with hemophilia for 10 years followed by death

Life B: living in perfect health for 0 years followed by death

Participant chooses Life A (hemophilia): proceed to better than death (BTD) scale beginning at BTD question 3

Participant chooses Life B (perfect health): proceed with the worse than death (WTD) scale beginning at WTD question 3:

Participant chooses ‘They are about the same’: You are done (utility = 0.00)

**Better than death (BTD) scale**

**BTD question 3:**

Which would you rather?

Life A: Living with hemophilia for 10 years followed by death

Life B: living in perfect health for 9.5 years followed by death

Participant chooses Life A (hemophilia): You are done (final answer = 0.975 years)

Participant chooses Life B (perfect health): proceed to BTD question 4

Participant chooses ‘They are about the same’: You are done (final answer = 0.950 years)

**BTD question 4:**

Which would you rather?

Life A: Living with hemophilia for 10 years followed by death

Life B: living in perfect health for 0.5 years followed by death

Participant chooses Life A (hemophilia): proceed to BTD question 5

Participant chooses Life B (perfect health): you are done (final answer = 0.025 years)

Participant chooses ‘They are about the same’: You are done (final answer = 0.050 years)

**BTD question 5:**

Which would you rather?

Life A: Living with hemophilia for 10 years followed by death

Life B: living in perfect health for 9.0 years followed by death

Participant chooses Life A: You are done (final answer = 0.925 years)

Participant chooses Life B: Proceed to BTD question 6

Participant chooses ‘They are about the same’: You are done (final answer = 0.900 years)

**BTD question 6:**

Which would you rather?

Life A: Living with hemophilia for 10 years followed by death

Life B: living in perfect health for 1.0 year followed by death

Participant chooses Life A (hemophilia): proceed to BTD question 7

Participant chooses Life B (perfect health): you are done (final answer = 0.075 years)

Participant chooses ‘They are about the same’: You are done (final answer = 0.100 years)

**BTD question 7:**

Which would you rather?

Life A: Living with hemophilia for 10 years followed by death

Life B: living in perfect health for 8.5 years followed by death

Participant chooses Life A: You are done (final answer = 0.875 years)

Participant chooses Life B: Proceed to BTD question 8

Participant chooses ‘They are about the same’: You are done (final answer = 0.850 years)

**BTD question 8:**

Which would you rather?

Life A: Living with hemophilia for 10 years followed by death

Life B: living in perfect health for 1.5 years followed by death

Participant chooses Life A (hemophilia): proceed to BTD question 9

Participant chooses Life B (perfect health): you are done (final answer = 0.125 years)

Participant chooses ‘They are about the same’: You are done (final answer = 0.150 years)

**BTD question 9:**

Which would you rather?

Life A: Living with hemophilia for 10 years followed by death

Life B: living in perfect health for 8.0 years followed by death

Participant chooses Life A: You are done (final answer = 0.825 years)

Participant chooses Life B: Proceed to BTD question 10

Participant chooses ‘They are about the same’: You are done (final answer = 0.800 years)

**BTD question 10:**

Which would you rather?

Life A: Living with hemophilia for 10 years followed by death

Life B: living in perfect health for 2.0 years followed by death

Participant chooses Life A (hemophilia): proceed to BTD question 11

Participant chooses Life B (perfect health): you are done (final answer = 0.175 years)

Participant chooses ‘They are about the same’: You are done (final answer = 0.200 years)

**BTD question 11:**

Which would you rather?

Life A: Living with hemophilia for 10 years followed by death

Life B: living in perfect health for 7.5 years followed by death

Participant chooses Life A: You are done (final answer = 0.775 years)

Participant chooses Life B: Proceed to BTD question 12

Participant chooses ‘They are about the same’: You are done (final answer = 0.750 years)

**BTD question 12:**

Which would you rather?

Life A: Living with hemophilia for 10 years followed by death

Life B: living in perfect health for 2.5 years followed by death

Participant chooses Life A (hemophilia): proceed to BTD question 13

Participant chooses Life B (perfect health): you are done (final answer = 0.225 years)

Participant chooses ‘They are about the same’: You are done (final answer = 0.250 years)

**BTD question 13:**

Which would you rather?

Life A: Living with hemophilia for 10 years followed by death

Life B: living in perfect health for 7.0 years followed by death

Participant chooses Life A: You are done (final answer = 0.725 years)

Participant chooses Life B: Proceed to BTD question 14

Participant chooses ‘They are about the same’: You are done (final answer = 0.700 years)

**BTD question 14:**

Which would you rather?

Life A: Living with hemophilia for 10 years followed by death

Life B: living in perfect health for 3.0 years followed by death

Participant chooses Life A (hemophilia): proceed to BTD question 15

Participant chooses Life B (perfect health): you are done (final answer = 0.275 years)

Participant chooses ‘They are about the same’: You are done (final answer = 0.300 years)

**BTD question 15:**

Which would you rather?

Life A: Living with hemophilia for 10 years followed by death

Life B: living in perfect health for 6.5 years followed by death

Participant chooses Life A: You are done (final answer = 0.675 years)

Participant chooses Life B: Proceed to BTD question 16

Participant chooses ‘They are about the same’: You are done (final answer = 0.650 years)

**BTD question 16:**

Which would you rather?

Life A: Living with hemophilia for 10 years followed by death

Life B: living in perfect health for 3.5 years followed by death

Participant chooses Life A (hemophilia): proceed to BTD question 17

Participant chooses Life B (perfect health): you are done (final answer = 0.325 years)

Participant chooses ‘They are about the same’: You are done (final answer = 0.350 years)

**BTD question 17:**

Which would you rather?

Life A: Living with hemophilia for 10 years followed by death

Life B: living in perfect health for 6.0 years followed by death

Participant chooses Life A: You are done (final answer = 0.625 years)

Participant chooses Life B: Proceed to BTD question 18

Participant chooses ‘They are about the same’: You are done (final answer = 0.600 years)

**BTD question 18:**

Which would you rather?

Life A: Living with hemophilia for 10 years followed by death

Life B: living in perfect health for 4.0 years followed by death

Participant chooses Life A (hemophilia): proceed to BTD question 19

Participant chooses Life B (perfect health): you are done (final answer = 0.375 years)

Participant chooses ‘They are about the same’: You are done (final answer = 0.400 years)

**BTD question 19:**

Which would you rather?

Life A: Living with hemophilia for 10 years followed by death

Life B: living in perfect health for 5.5 years followed by death

Participant chooses Life A: You are done (final answer = 0.575 years)

Participant chooses Life B: Proceed to BTD question 20

Participant chooses ‘They are about the same’: You are done (final answer = 0.550 years)

**BTD question 20:**

Which would you rather?

Life A: Living with hemophilia for 10 years followed by death

Life B: living in perfect health for 4.5 years followed by death

Participant chooses Life A (hemophilia): proceed to BTD question 21

Participant chooses Life B (perfect health): you are done (final answer = 0.425 years)

Participant chooses ‘They are about the same’: You are done (final answer = 0.450 years)

**BTD question 21:**

Which would you rather?

Life A: Living with hemophilia for 10 years followed by death

Life B: living in perfect health for 5.0 years followed by death

Participant chooses Life A: You are done (final answer = 0.525 years)

Participant chooses Life B: You are done (final answer: 0.475 years)

Participant chooses ‘They are about the same’: You are done (final answer = 0.500 years)

Worse than death (WTD) scale

**WTD question 3:**

Which would you rather?

Life A: Living with perfect health for 0.5 years, followed by 9.5 years with hemophilia, then immediate death

Life B: Immediate death

Participant chooses Life A (perfect health/hemophilia): you are done (utility = -0.0256)

Participant chooses Life B (immediate death): proceed to question 4

Participant chooses ‘They are about the same’: you are done (utility = -0.0526)

**WTD question 4:**

Which would you rather?

Life A: Living with perfect health for 9.5 years, followed by 0.5 years with hemophilia, then immediate death

Life B: Immediate death

Participant chooses Life A (perfect health/hemophilia): you are done (utility = -39.0000)

Participant chooses Life B (immediate death): proceed to question 5

Participant chooses ‘They are about the same’: you are done (utility = -19.0000)

**WTD question 5:**

Which would you rather?

Life A: Living with perfect health for 1.0 years, followed by 9.0 years with hemophilia, then immediate death

Life B: Immediate death

Participant chooses Life A (perfect health/hemophilia): you are done (utility = -0.0811)

Participant chooses Life B (immediate death): proceed to question 4

Participant chooses ‘They are about the same’: you are done (utility = -0.1111)

**WTD question 6:**

Which would you rather?

Life A: Living with perfect health for 9.0 years, followed by 1.0 years with hemophilia, then immediate death

Life B: Immediate death

Participant chooses Life A (perfect health/hemophilia): you are done (utility = -12.3333)

Participant chooses Life B (immediate death): proceed to question 7

Participant chooses ‘They are about the same’: you are done (utility = -9.0000)

**WTD question 7:**

Which would you rather?

Life A: Living with perfect health for 1.5 years, followed by 8.5 years with hemophilia, then immediate death

Life B: Immediate death

Participant chooses Life A (perfect health/hemophilia): you are done (utility = -0.1429)

Participant chooses Life B (immediate death): proceed to question 4

Participant chooses ‘They are about the same’: you are done (utility = -0.1765)

**WTD question 8:**

Which would you rather?

Life A: Living with perfect health for 8.5 years, followed by 1.5 years with hemophilia, then immediate death

Life B: Immediate death

Participant chooses Life A (perfect health/hemophilia): you are done (utility = -5.6667)

Participant chooses Life B (immediate death): proceed to question 9

Participant chooses ‘They are about the same’: you are done (utility = -7.0000)

**WTD question 9:**

Which would you rather?

Life A: Living with perfect health for 2.0 years, followed by 8.0 years with hemophilia, then immediate death

**Life B: Immediate death**

Participant chooses Life A (perfect health/hemophilia): you are done (utility = -0.2121)

Participant chooses Life B (immediate death): proceed to question 4

Participant chooses ‘They are about the same’: you are done (utility = -0.2500)

WTD question 10:

Which would you rather?

Life A: Living with perfect health for 8.0 years, followed by 2.0 years with hemophilia, then immediate death

Life B: Immediate death

Participant chooses Life A (perfect health/hemophilia): you are done (utility = -4.7143)

Participant chooses Life B (immediate death): proceed to question 11

Participant chooses ‘They are about the same’: you are done (utility = -4.0000)

**WTD question 11:**

Which would you rather?

Life A: Living with perfect health for 2.5 years, followed by 7.5 years with hemophilia, then immediate death

Life B: Immediate death

Participant chooses Life A (perfect health/hemophilia): you are done (utility = -0.2903)

Participant chooses Life B (immediate death): proceed to question 4

Participant chooses ‘They are about the same’: you are done (utility = -0.3333)

**WTD question 12:**

Which would you rather?

Life A: Living with perfect health for 7.5 years, followed by 2.5 years with hemophilia, then immediate death

Life B: Immediate death

Participant chooses Life A (perfect health/hemophilia): you are done (utility = -3.4444)

Participant chooses Life B (immediate death): proceed to question 13

Participant chooses ‘They are about the same’: you are done (utility = --3.0000)

**WTD question 13:**

Which would you rather?

Life A: Living with perfect health for 3.0 years, followed by 7.0 years with hemophilia, then immediate death

Life B: Immediate death

Participant chooses Life A (perfect health/hemophilia): you are done (utility = -0.3793)

Participant chooses Life B (immediate death): proceed to question 4

Participant chooses ‘They are about the same’: you are done (utility = -0.4286)

**WTD question 14:**

Which would you rather?

Life A: Living with perfect health for 7.0 years, followed by 3.0 years with hemophilia, then immediate death

Life B: Immediate death

Participant chooses Life A (perfect health/hemophilia): you are done (utility = -2.6364)

Participant chooses Life B (immediate death): proceed to question 15

Participant chooses ‘They are about the same’: you are done (utility = -2.3333)

**WTD question 15:**

Which would you rather?

Life A: Living with perfect health for 3.5 years, followed by 6.5 years with hemophilia, then immediate death

Life B: Immediate death

Participant chooses Life A (perfect health/hemophilia): you are done (utility = -0.4815)

Participant chooses Life B (immediate death): proceed to question 4

Participant chooses ‘They are about the same’: you are done (utility = -0.5385)

**WTD question 16:**

Which would you rather?

Life A: Living with perfect health for 6.5 years, followed by 3.5 years with hemophilia, then immediate death

Life B: Immediate death

Participant chooses Life A (perfect health/hemophilia): you are done (utility = -2.0769)

Participant chooses Life B (immediate death): proceed to question 17

Participant chooses ‘They are about the same’: you are done (utility = -1.8751)

**WTD question 17:**

Which would you rather?

Life A: Living with perfect health for 4.0 years, followed by 6.0 years with hemophilia, then immediate death

Life B: Immediate death

Participant chooses Life A (perfect health/hemophilia): you are done (utility = -0.6000)

Participant chooses Life B (immediate death): proceed to question 4

Participant chooses ‘They are about the same’: you are done (utility = -0.6667)

**WTD question 18:**

Which would you rather?

Life A: Living with perfect health for 6.0 years, followed by 4.0 years with hemophilia, then immediate death

Life B: Immediate death

Participant chooses Life A (perfect health/hemophilia): you are done (utility = -1.6667)

Participant chooses Life B (immediate death): proceed to question 19

Participant chooses ‘They are about the same’: you are done (utility = -1.5000)

**WTD question 19:**

Which would you rather?

Life A: Living with perfect health for 4.5 years, followed by 5.5 years with hemophilia, then immediate death

**Life B: Immediate death**

Participant chooses Life A (perfect health/hemophilia): you are done (utility = -0.7391)

Participant chooses Life B (immediate death): proceed to question 4

Participant chooses ‘They are about the same’: you are done (utility = -0.8121)

**WTD question 20:**

Which would you rather?

Life A: Living with perfect health for 5.5 years, followed by 4.5 years with hemophilia, then immediate death

**Life B: Immediate death**

Participant chooses Life A (perfect health/hemophilia): you are done (utility = -1.3529)

Participant chooses Life B (immediate death): proceed to question 21

Participant chooses ‘They are about the same’: you are done (utility = -1.2222)

**WTD question 21:**

Which would you rather?

Life A: Living with perfect health for 5.0 years, followed by 5.0 years with hemophilia, then immediate death

Life B: Immediate death

Participant chooses Life A (perfect health/hemophilia): you are done (utility = -0.9048)

Participant chooses Life B (immediate death): you are done (utility = -1.1053)

Participant chooses ‘They are about the same’: you are done (utility = -1.0000)

**Appendix 2: Study materials**

Hemophilia adult


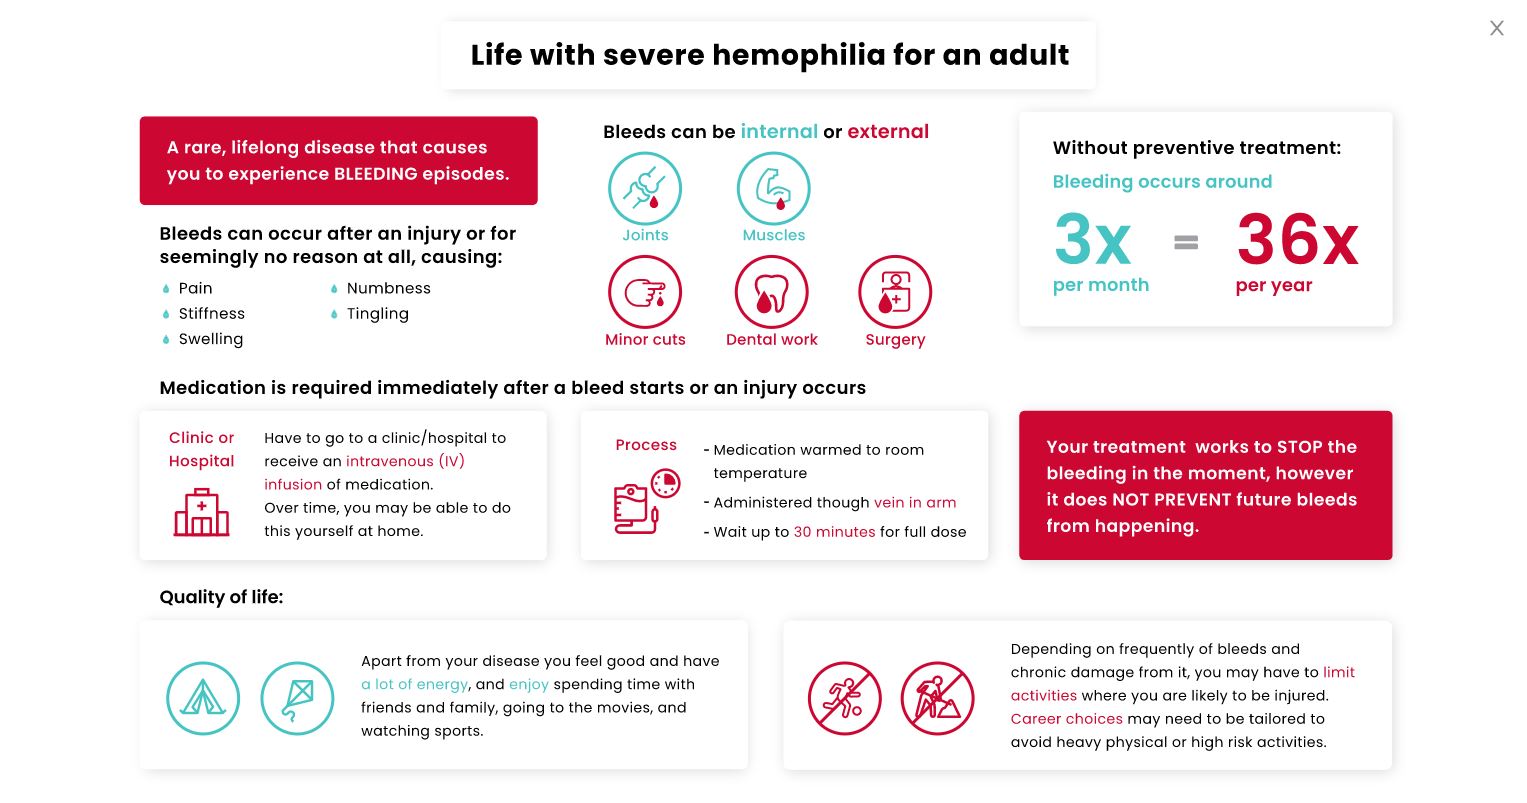


Hemophilia child


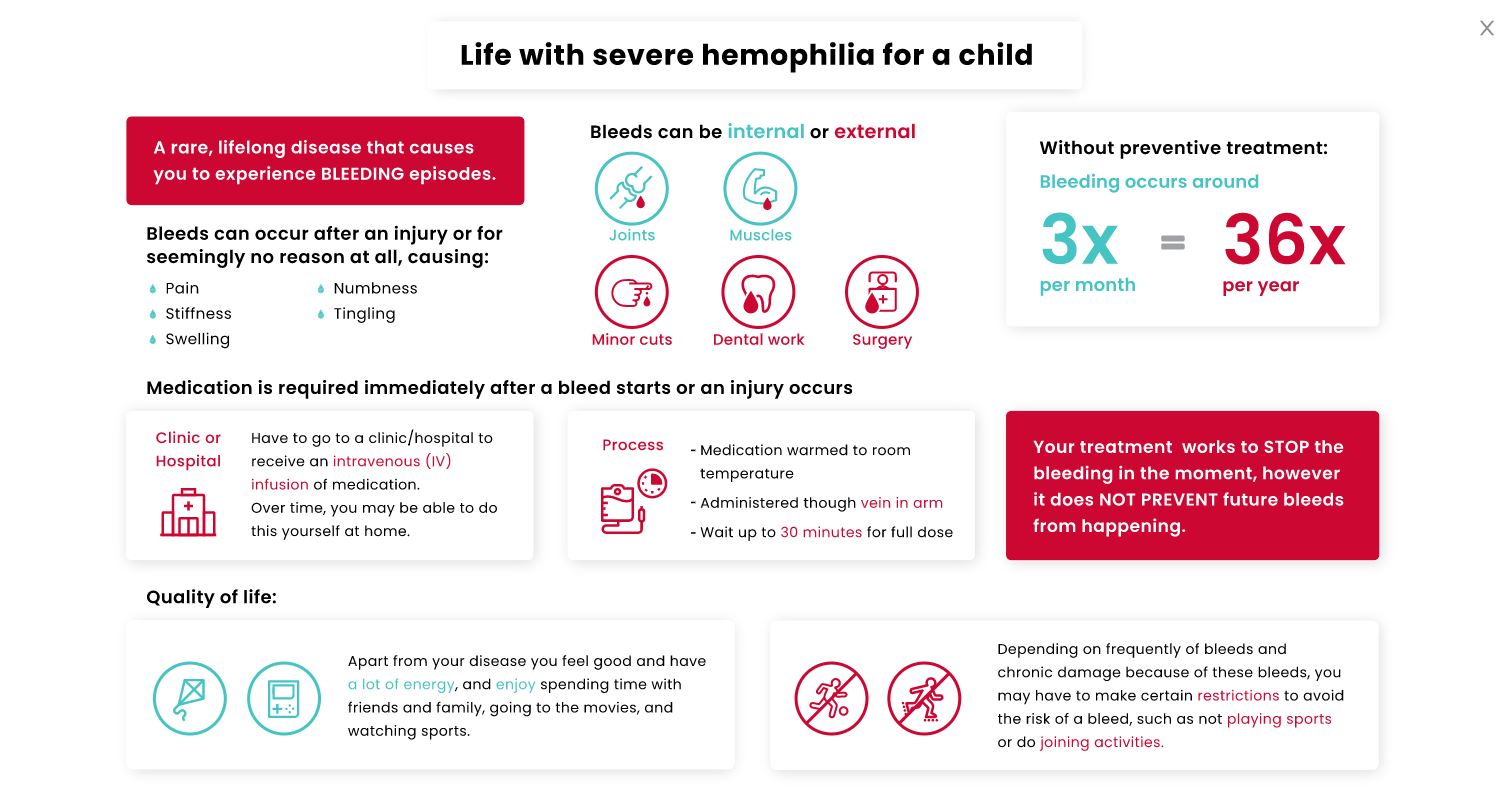


Intravenous infusion prophylaxis adult


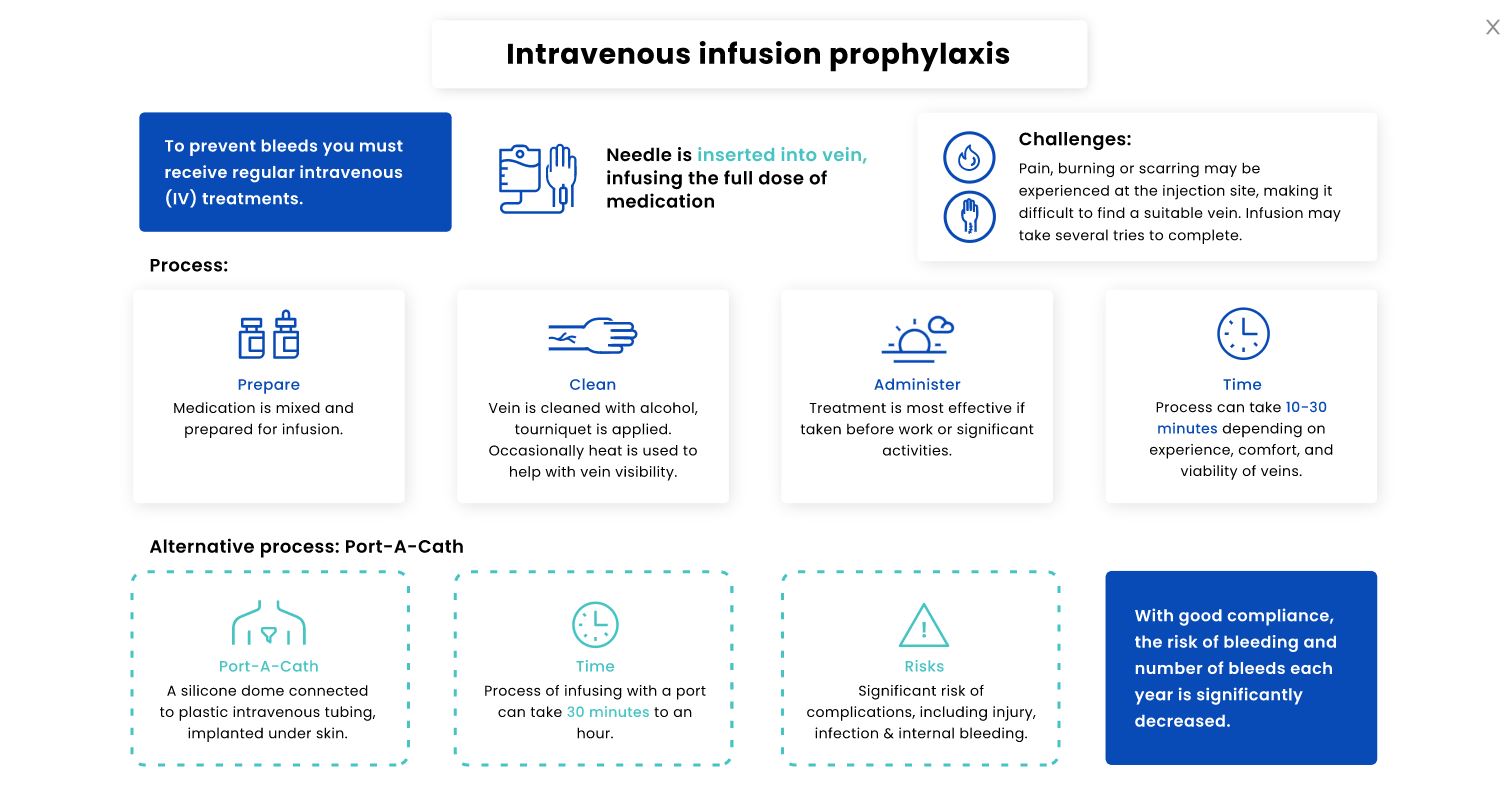


Intravenous prophylaxis child


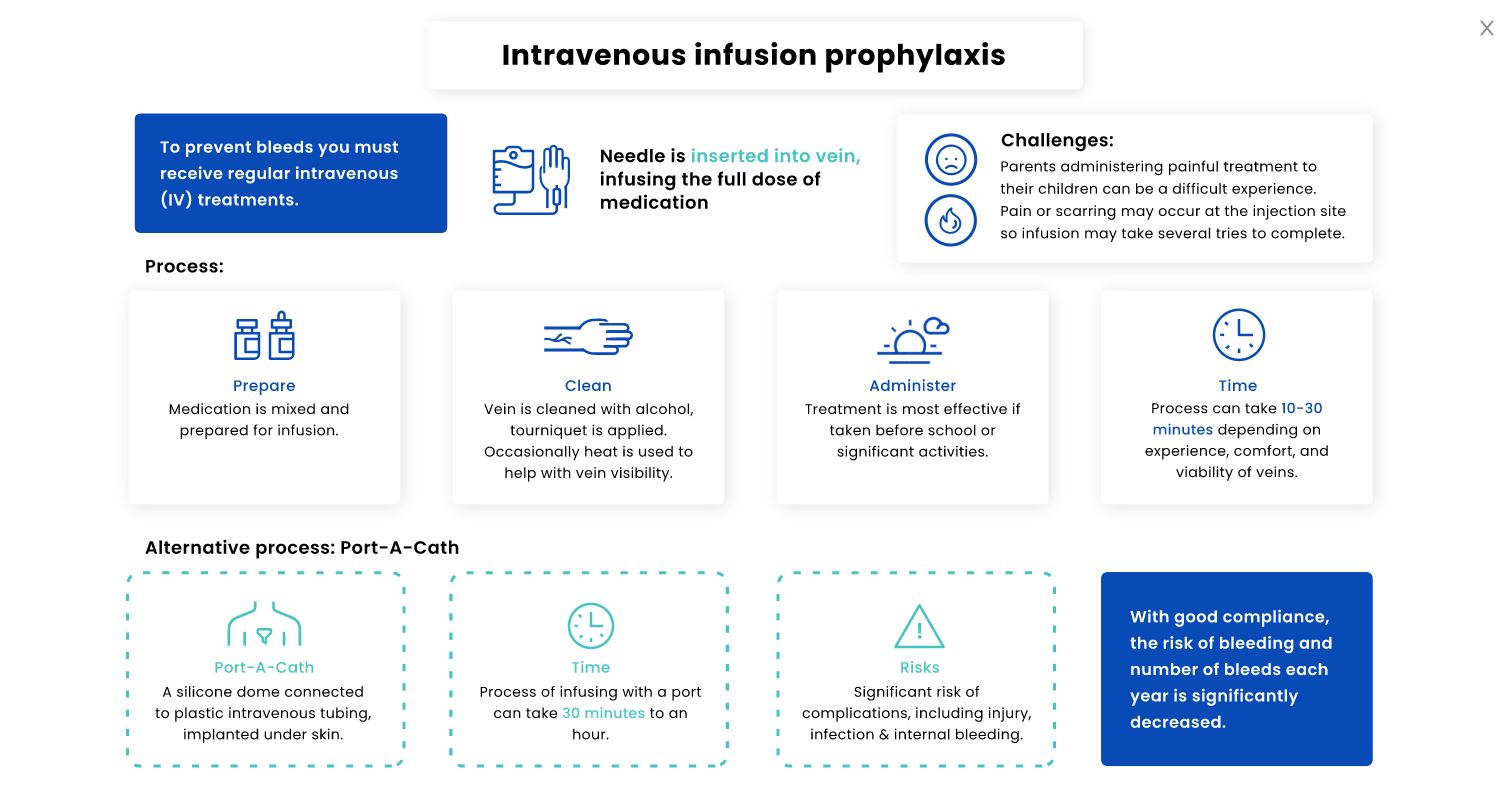


Subcutaneous prophylaxis adult


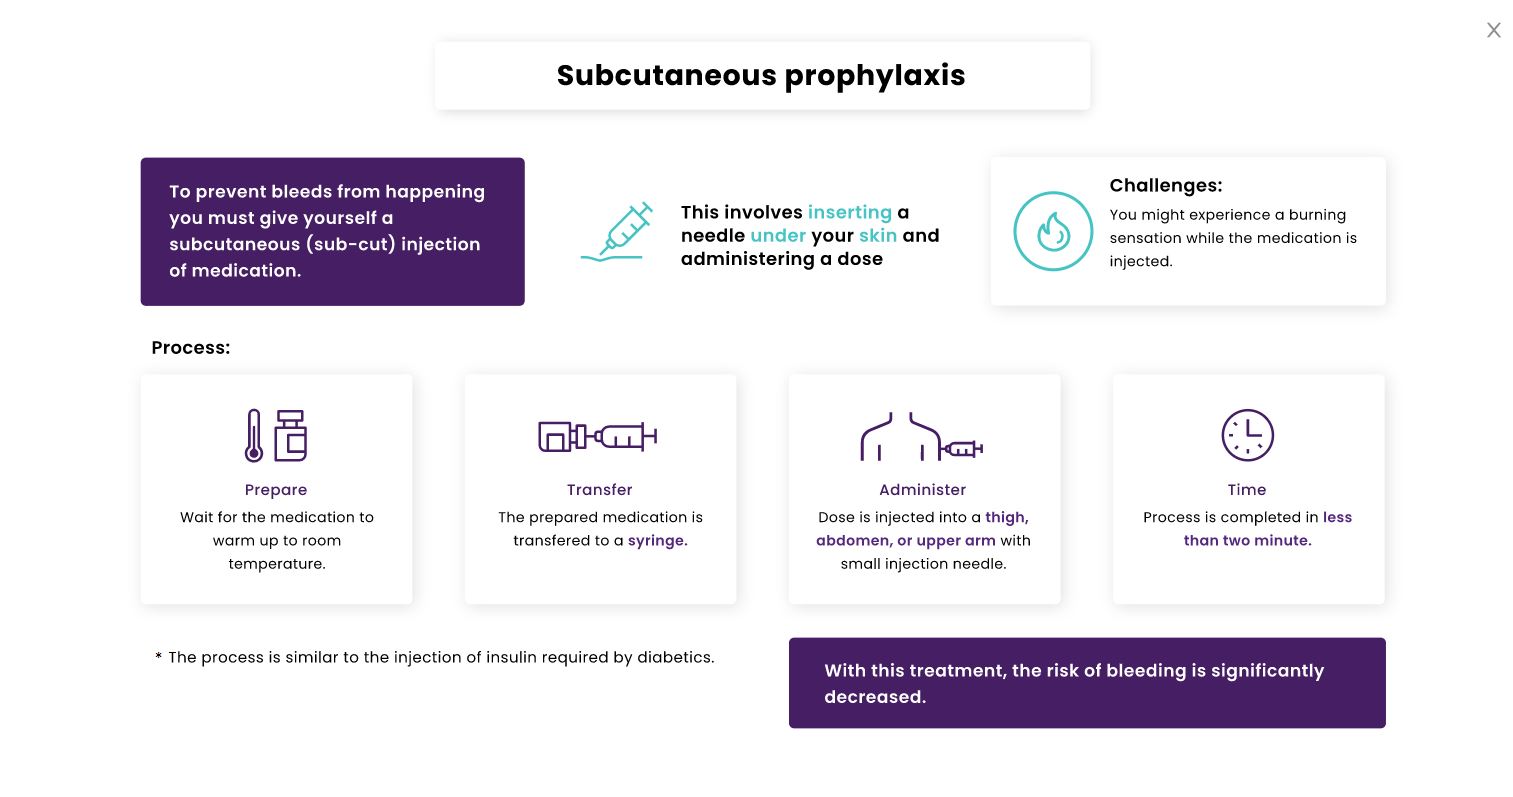


Subcutaneous prophylaxis child


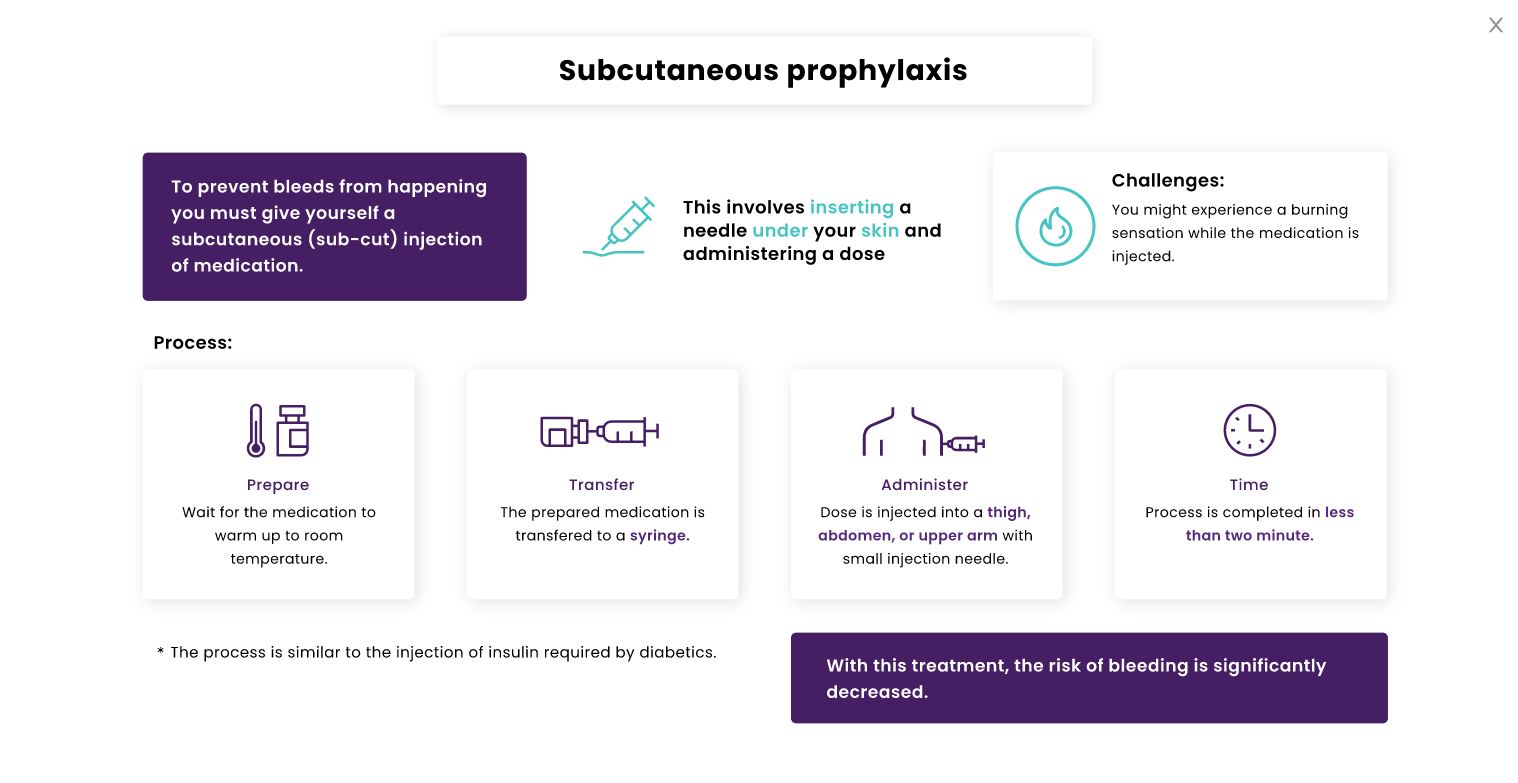


Time-trade off question example


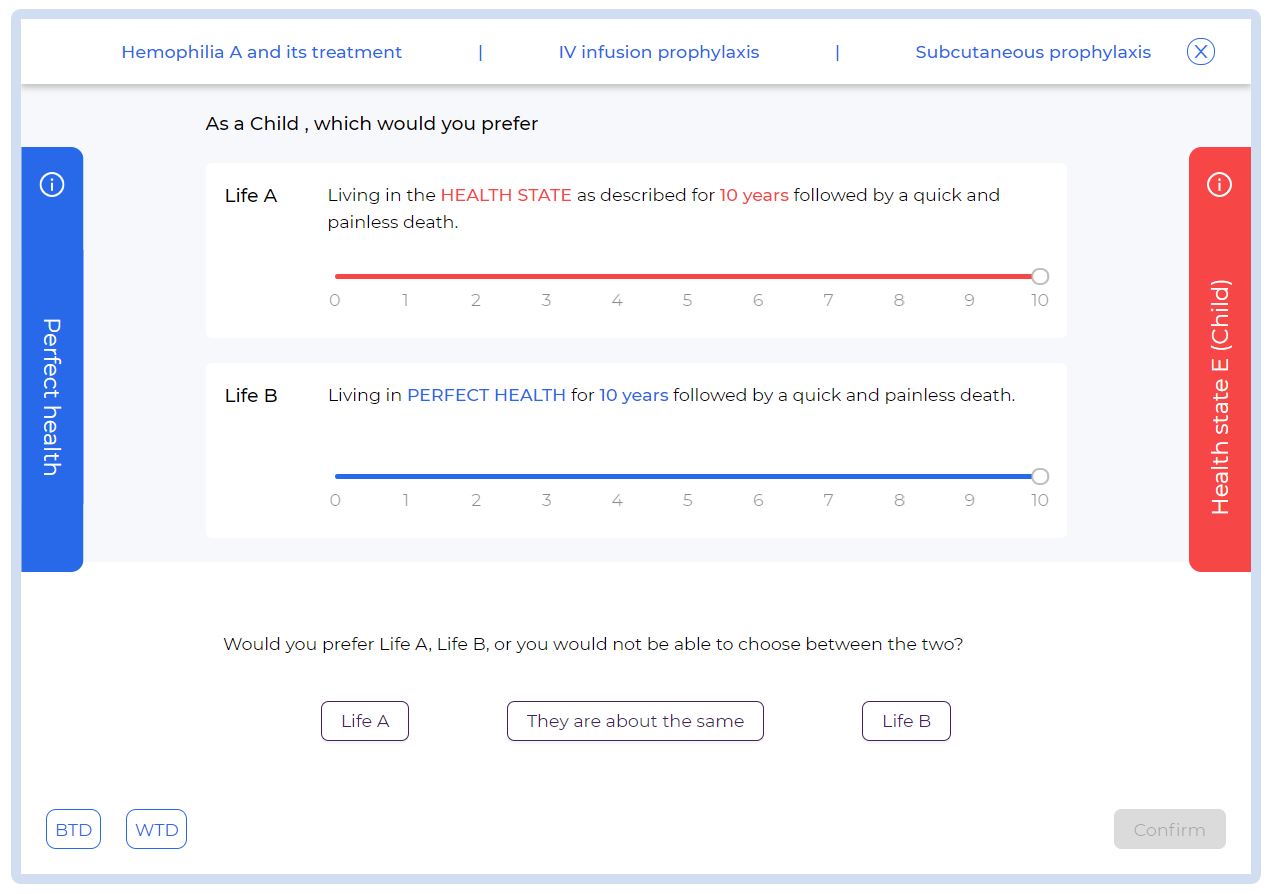


Visual analogue scale question


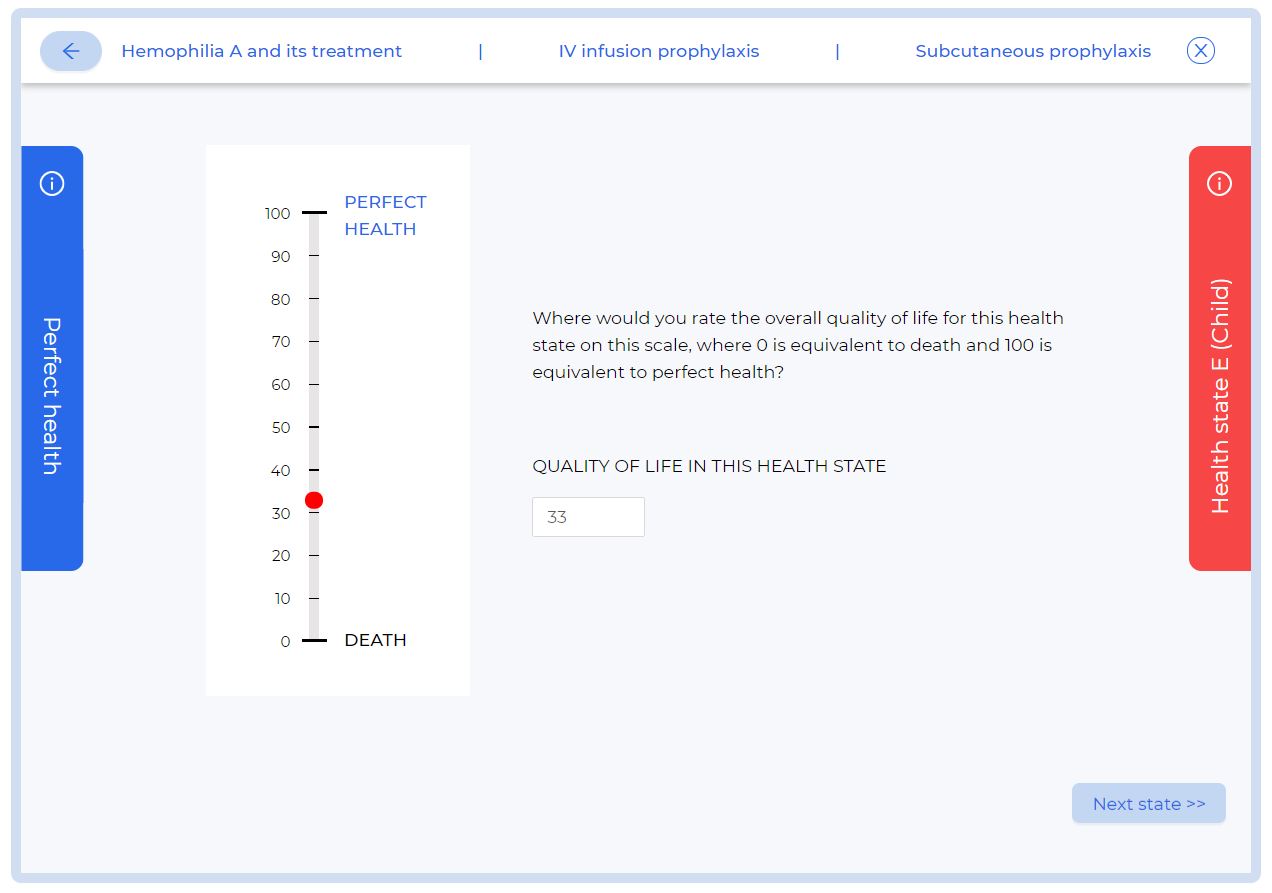


Example with “Perfect health” and “Health state” pop-ups activated


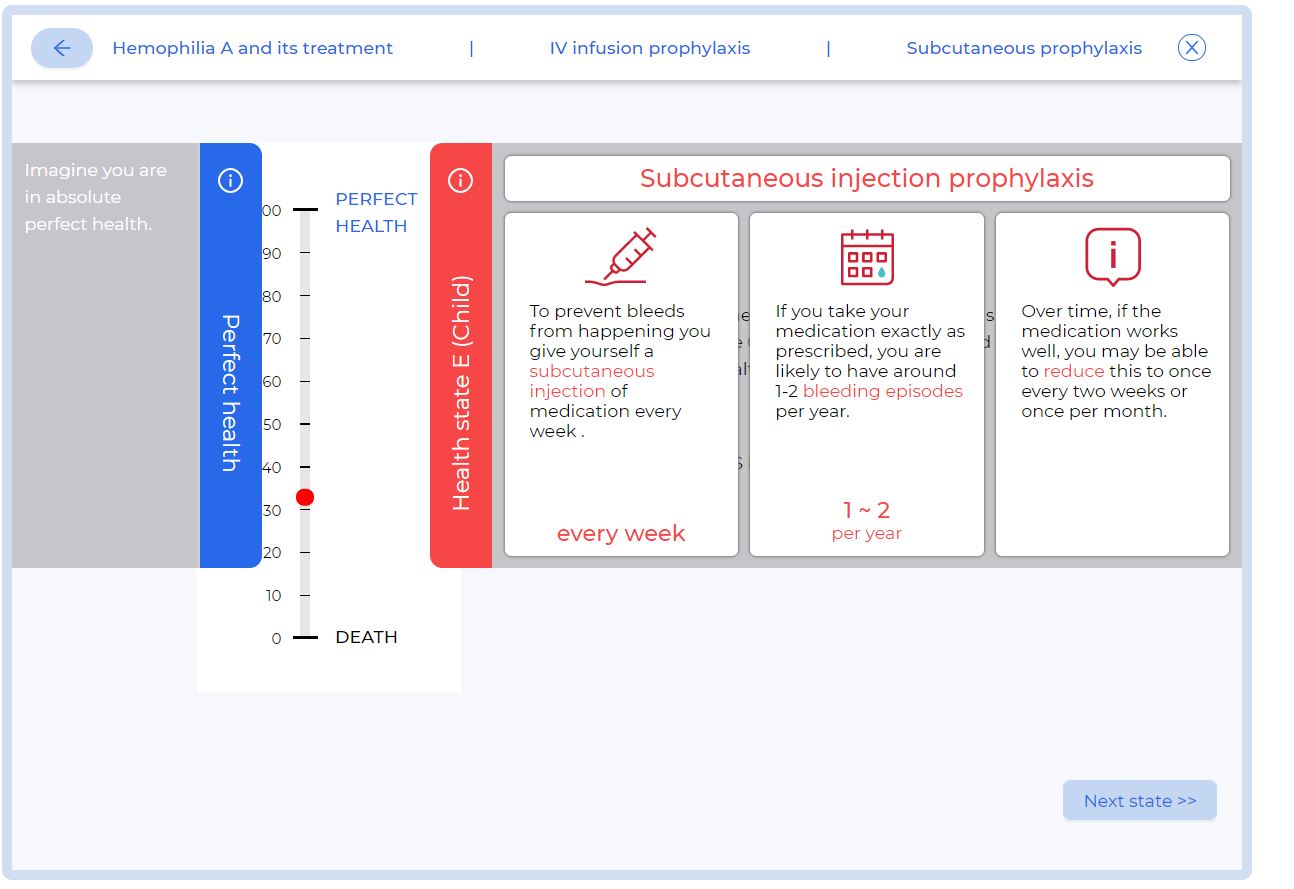

Supplement: Supplementary file 1 [file get_supplementary_file.php]
